# Supplementary material for: Constructing more informative plant–pollinator networks: visitation and pollen deposition networks in a heathland plant community
Source: PubMed Central journal article supplement (PMC4571695; doi:10.1098/rspb.2015.1130), 2015-09-07
Supplement: rspb20151130supp3.pdf [file rspb20151130supp3.pdf]

# Constructing more informative plant-pollinator networks: visitation and pollen deposition networks in a heathland plant community

G Ballantyne, Katherine C R Baldock, P G Willmer

## Electronic Supplementary Material 3

Supplementary Information Table: Species level specialisation ( $d'$ ) and species strength for plant species and visitor groups. The more ecologically relevant metrics are in bold.

|                                  | Visitation   |                  | Pollinator Effectiveness (SVD) |                  | Pollinator Importance |                  |
|----------------------------------|--------------|------------------|--------------------------------|------------------|-----------------------|------------------|
|                                  | $d'$         | species strength | $d'$                           | species strength | $d'$                  | species strength |
| <b>Plants</b>                    |              |                  |                                |                  |                       |                  |
| <i>U. europeaus</i>              | 0.103        | <b>3.283</b>     | 0.316                          | 3.359            | <b>0.118</b>          | 3.306            |
| <i>E. tetralix</i>               | 0.172        | <b>2.707</b>     | 0.360                          | 3.240            | <b>0.226</b>          | 3.473            |
| <i>E. cinerea</i>                | 0.152        | <b>2.445</b>     | 0.310                          | 2.397            | <b>0.152</b>          | 1.757            |
| <i>C. vulgaris</i>               | 0.244        | <b>4.830</b>     | 0.405                          | 5.134            | <b>0.370</b>          | 5.464            |
| <i>U. minor</i>                  | 0.378        | <b>2.734</b>     | 0.299                          | 1.870            | <b>0.372</b>          | 2.001            |
| <b>Visitors</b>                  |              |                  |                                |                  |                       |                  |
| <i>Bombus terrestris/lucorum</i> | <b>0.080</b> | 2.425            | 0.027                          | 0.771            | 0.113                 | <b>2.465</b>     |
| <i>Bombus pascuorum</i>          | <b>0.291</b> | 0.412            | 0.226                          | 0.520            | 0.231                 | <b>0.435</b>     |
| <i>Bombus lapidarius</i>         | <b>0.239</b> | 0.632            | 0.006                          | 0.954            | 0.261                 | <b>0.735</b>     |
| <i>Bombus jonellus</i>           | <b>0.200</b> | 0.045            | 0.438                          | 0.611            | 0.334                 | <b>0.156</b>     |
| <i>Bombus hortorum</i>           | <b>0.363</b> | 0.060            | 0.406                          | 0.095            | 0.325                 | <b>0.036</b>     |
| <i>Apis mellifera</i>            | <b>0.213</b> | 0.958            | 0.174                          | 0.395            | 0.364                 | <b>0.743</b>     |
| Halictidae                       | <b>0.280</b> | 0.078            | 0.317                          | 0.267            | 0.216                 | <b>0.067</b>     |
| Other solitary bees              | <b>0.192</b> | 0.159            | 0.341                          | 0.624            | 0.273                 | <b>0.234</b>     |
| Large hoverflies                 | <b>0.100</b> | 0.029            | 0.166                          | 0.103            | 0.135                 | <b>0.010</b>     |
| <i>Episyrrhus</i>                | <b>0.206</b> | 0.056            | 0.304                          | 0.219            | 0.212                 | <b>0.037</b>     |
| <i>Eupeodes</i>                  | <b>0.165</b> | 0.019            | 0.251                          | 0.073            | 0.135                 | <b>0.005</b>     |
| Small hoverflies                 | <b>0.117</b> | 0.030            | 0.188                          | 0.132            | 0.126                 | <b>0.008</b>     |
| Muscidae                         | <b>0.350</b> | 0.050            | 0.468                          | 0.161            | 0.350                 | <b>0.051</b>     |
| Ants ( <i>Lasius</i> )           | <b>0.324</b> | 0.035            | 0.406                          | 0.033            | 0.281                 | <b>0.016</b>     |
| Lepidoptera                      | <b>0.265</b> | 0.012            | 0.325                          | 0.035            | 0.105                 | <b>0.003</b>     |
| Soldier fly                      | <b>0.105</b> | 0.003            | 0.239                          | 0.007            | <0.001                | <b>&lt;0.001</b> |
